# Supplementary material for: Taking a shortcut: evidence of path integration in fish
Source: Research Square preprint supplement (doi:10.21203/rs.3.rs-3234472/v1), 2023-08-22
Supplement: Supplementary file 1 [file f82965e26c99d4cd4b0d781e.docx]

Data information for **“Taking a shortcut: evidence of path integration in fish “**

Adelaide Sibeaux1, Cait Newport1, Jonathan P. Green1, Jacob Engelmann2, Theresa Burt de Perera1

### Corresponding author: adelaide.sibeaux@biology.ox.ac.uk

**All data and code have been added to the Dryad depository today (04 August 2023):**

Sibeaux, Adelaide et al. (2023), Taking a shortcut: evidence of path integration in fish _ All data and Codes, Dryad, Dataset, <https://doi.org/10.5061/dryad.83bk3j9xr>

**Email received by Dryad with link to data and codes:**

A private, randomized URL has been created for your submission. This temporary link can be shared with the journal office and/or collaborators while your manuscript is in peer review and your dataset is unpublished. Clicking the link immediately launches a download of the data files only: <https://datadryad.org/stash/share/cHlL6Qj9slWqmVFEJljLUtdgO_uJkvm5v-gevb94SKg>

Your data submission has also been assigned a unique DOI (doi:10.5061/dryad.83bk3j9xr). You may provide this DOI to the journal or include it in your manuscript, although it will not be live until the dataset is published. Should you need to reach out to Dryad’s Helpdesk regarding this submission, kindly provide the DOI in your email to ensure efficient and effective assistance.
